# Supplementary material
Source: PubMed Central journal article supplement (PMC3602120)
Supplement: NIHMS432608-supplement-1.pdf [file NIHMS432608-supplement-1.pdf]

**Supplemental Table 1: Immunostaining of selected pancreatic cell lineage markers in ductal and poorly differentiated cancerous lesions of Pdx1-Cre/CAG-tTA/TetO-Myc transgenic mice.**

|         | cancerous lesions |                       | normal controls |        |       |
|---------|-------------------|-----------------------|-----------------|--------|-------|
|         | ductal            | poorly differentiated | ductal          | acinar | islet |
| PDX-1   | ++                | --                    | --              | --     | +++   |
| SOX-9   | +++               | --                    | +++             | --     | --    |
| Pan-CK  | +++               | +                     | n.d.            | n.d.   | n.d.  |
| CK19    | +++               | --                    | +++             | --     | --    |
| MUC1    | +++               | +                     | +++             | +**    | --    |
| Amylase | --*               | --                    | --              | +++    | --    |
| Insulin | --                | --                    | --              | --     | +++   |
| E-cad   | +++               | +++                   | +++             | +++    | +++   |
| EGFR    | ++                | +                     | +               | --     | +     |
| ErbB2   | +++               | +                     | +               | +      | +     |

\* occasionally detected in isolated cells

\*\* only in the centroacinar cells

-- negative; + weak, ++ moderate, +++ strong staining; n.d. not determined
