# Supplementary material
Source: PubMed Central journal article supplement (PMC3602120)

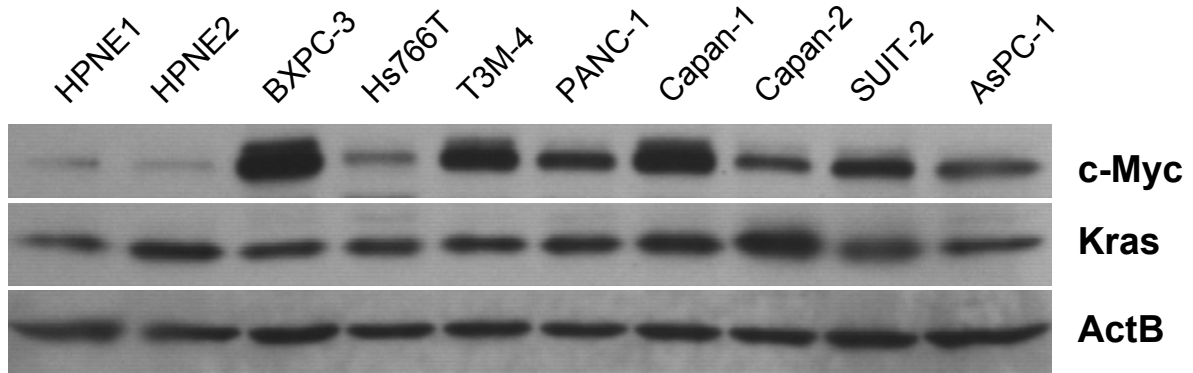

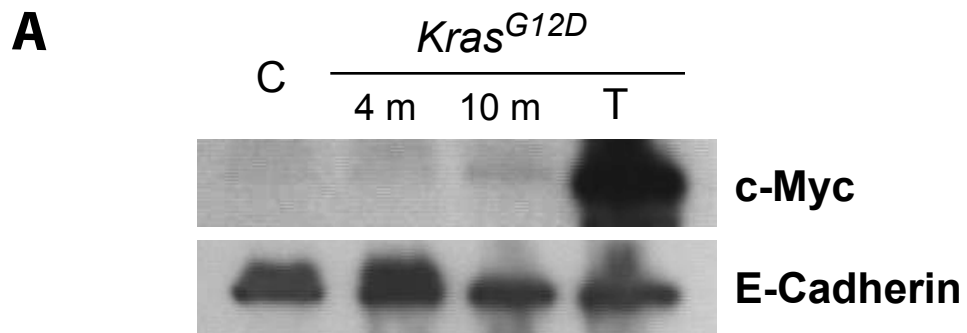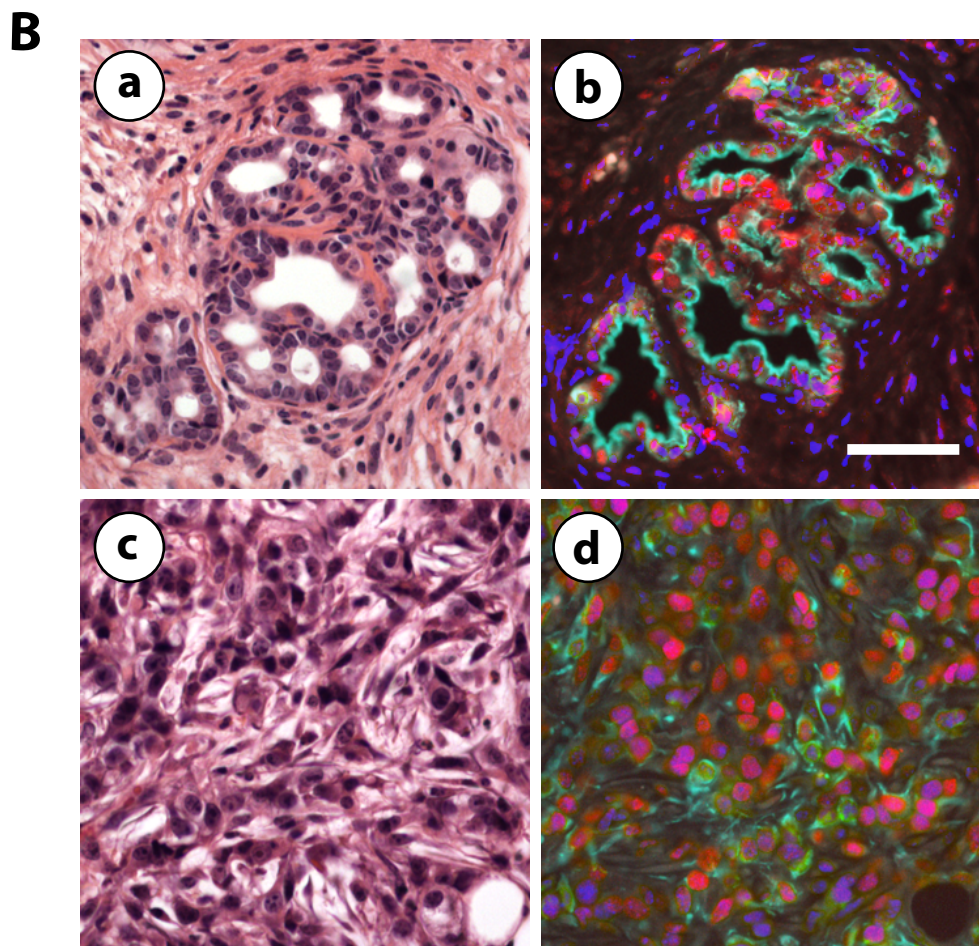

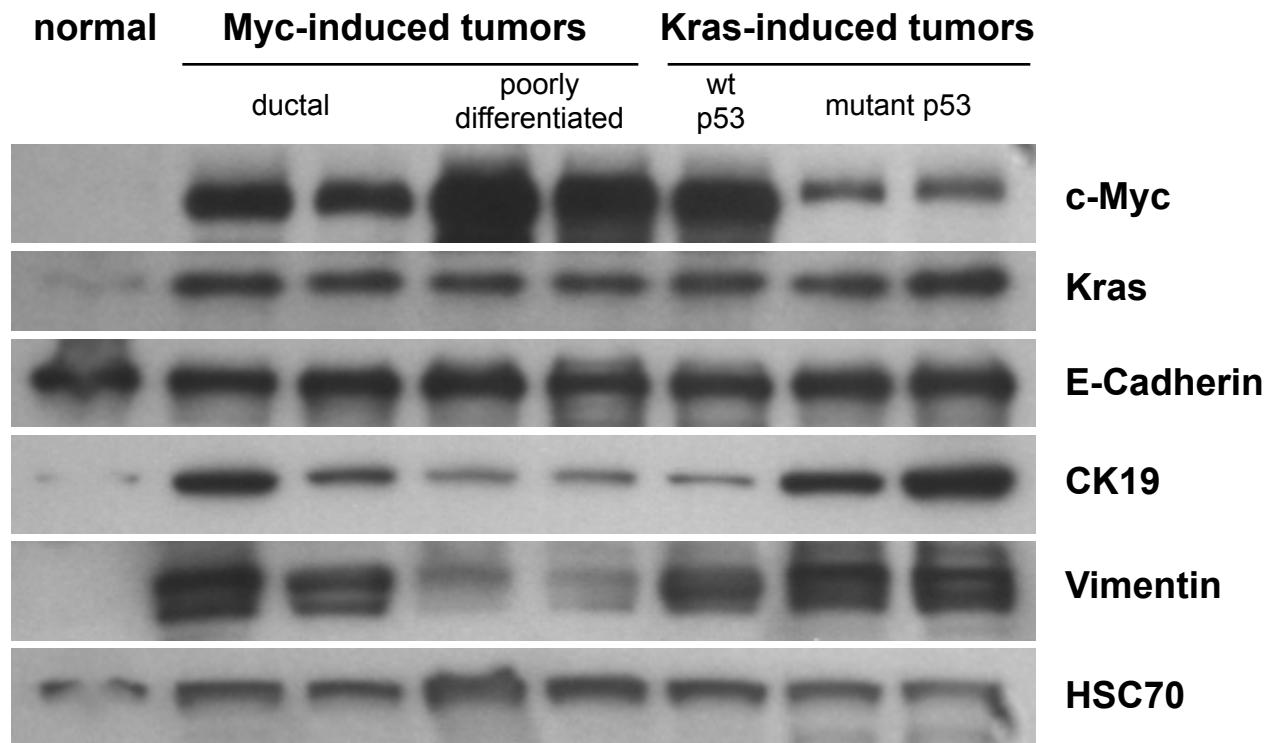

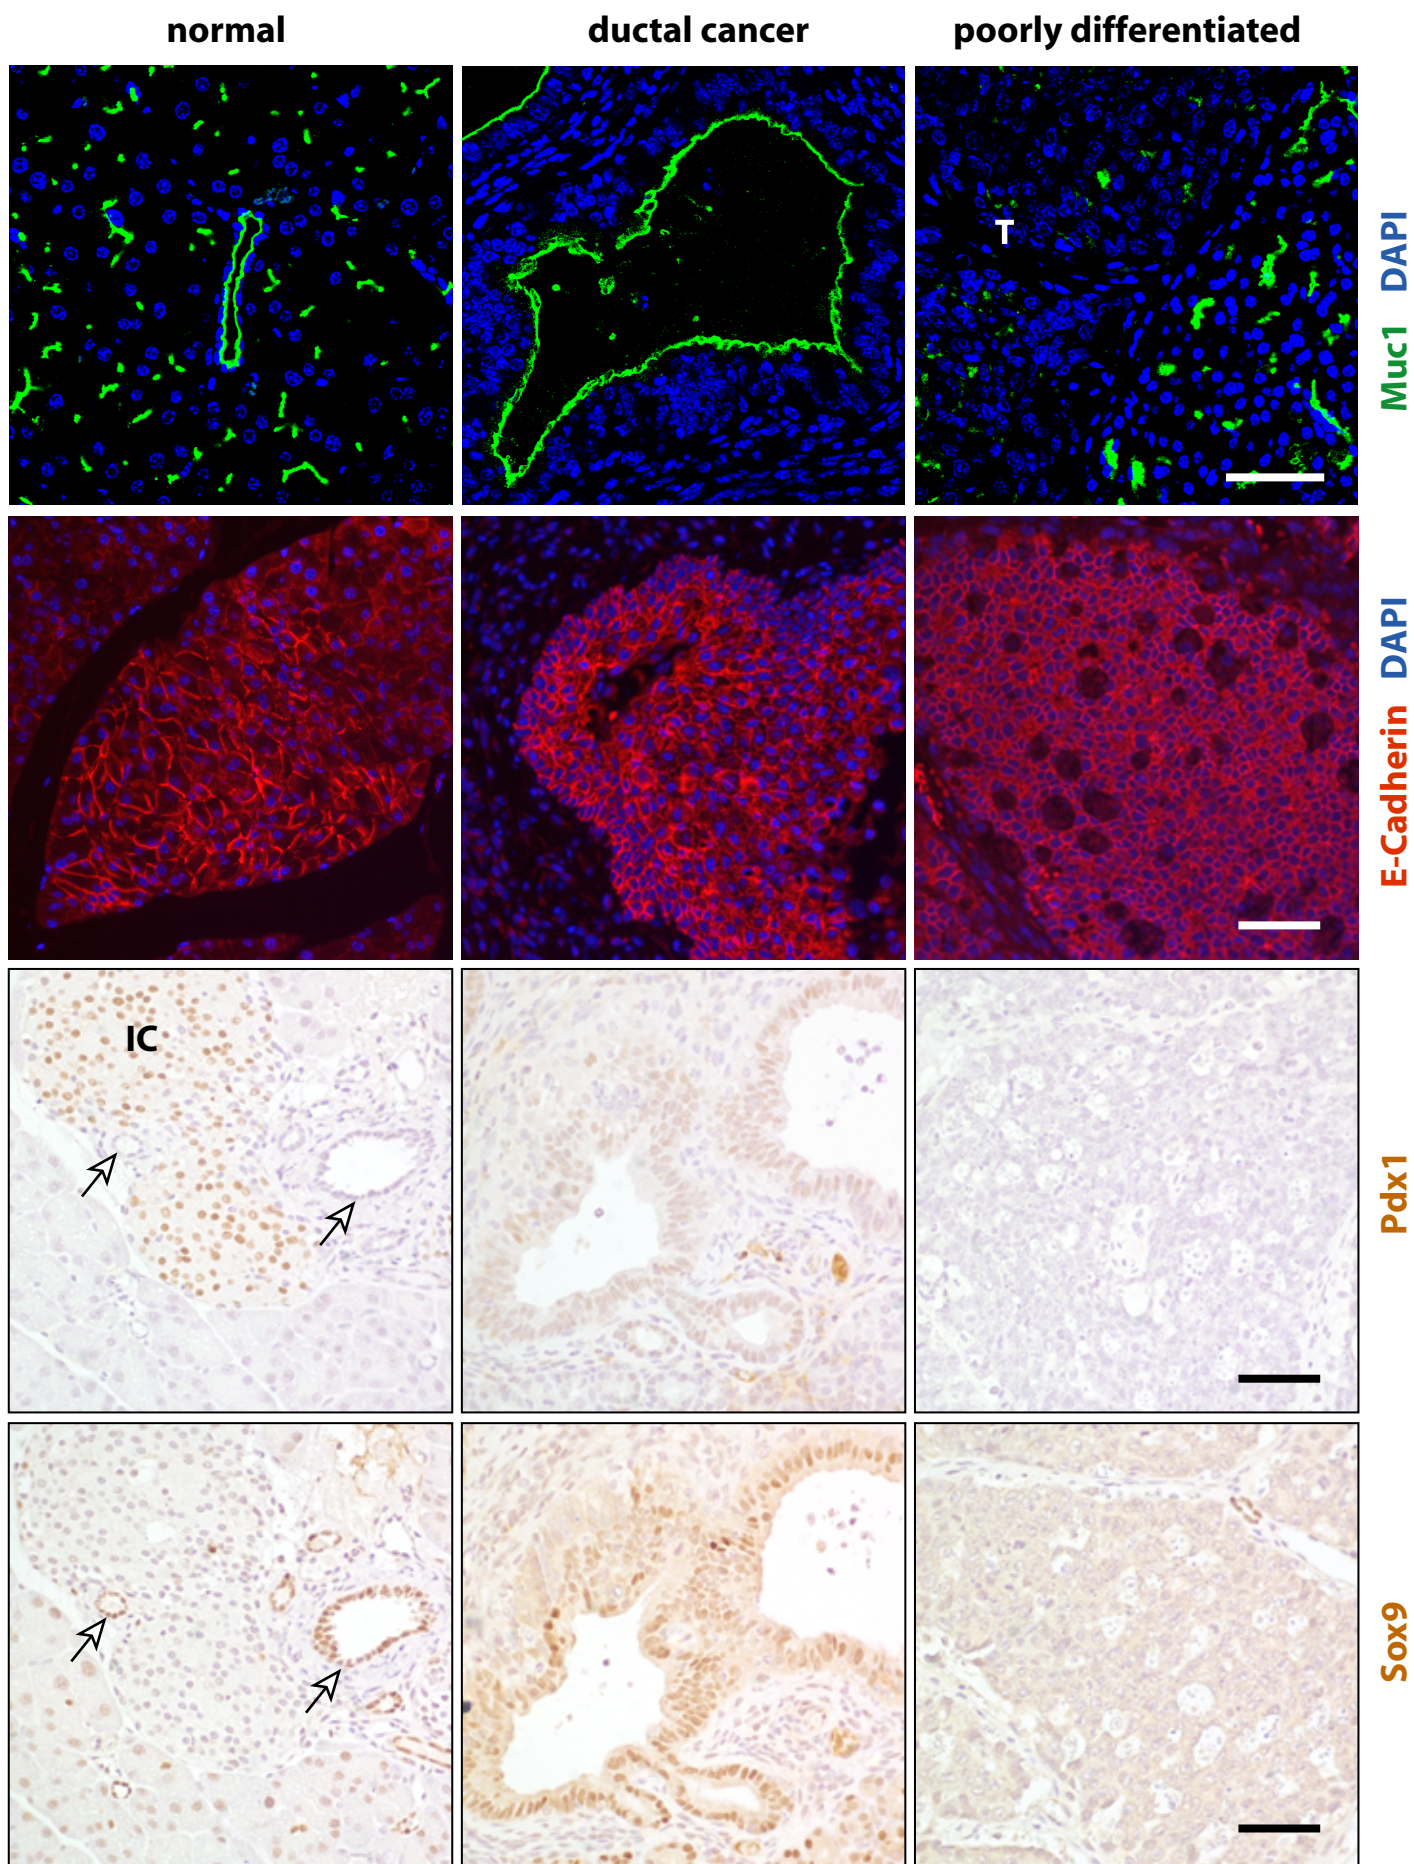

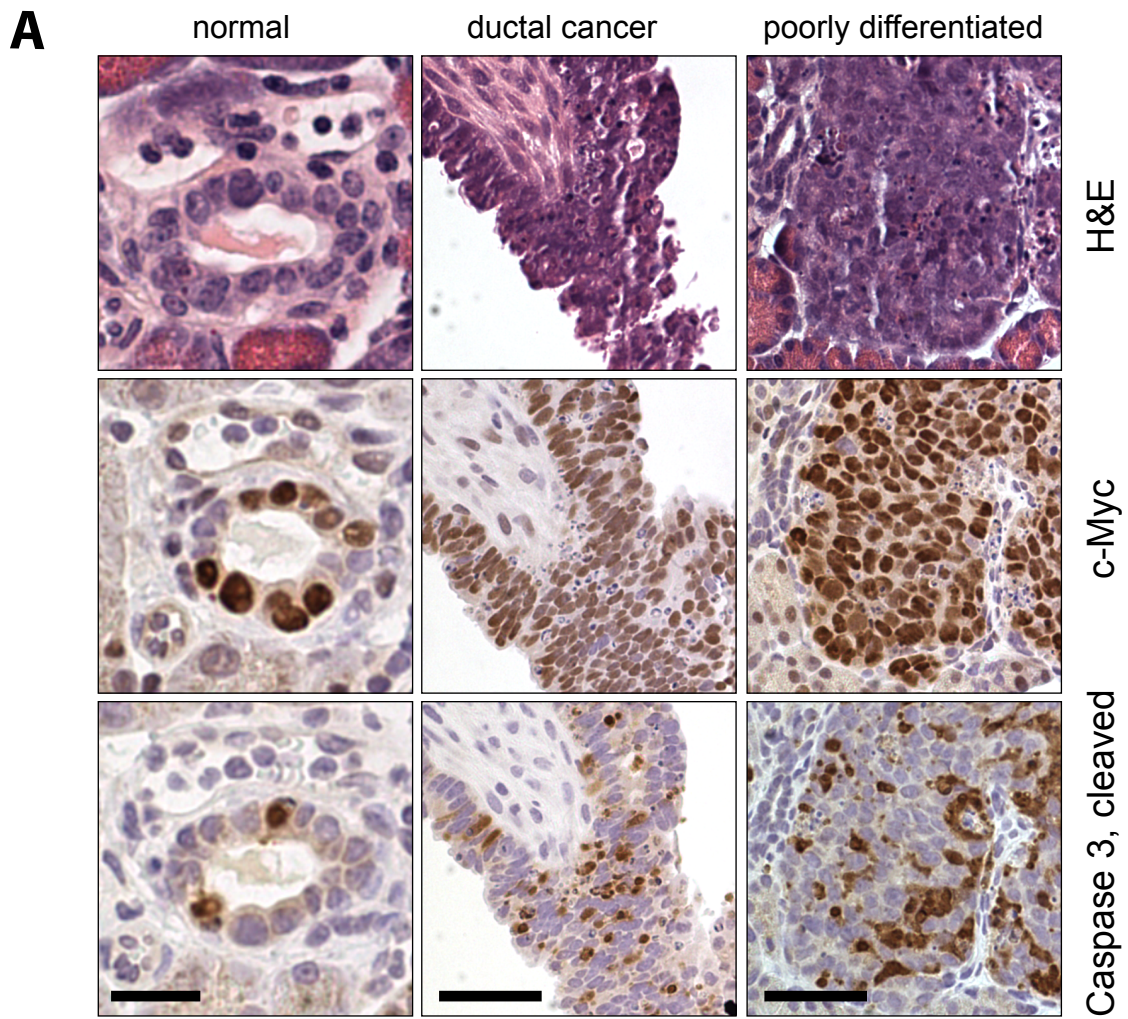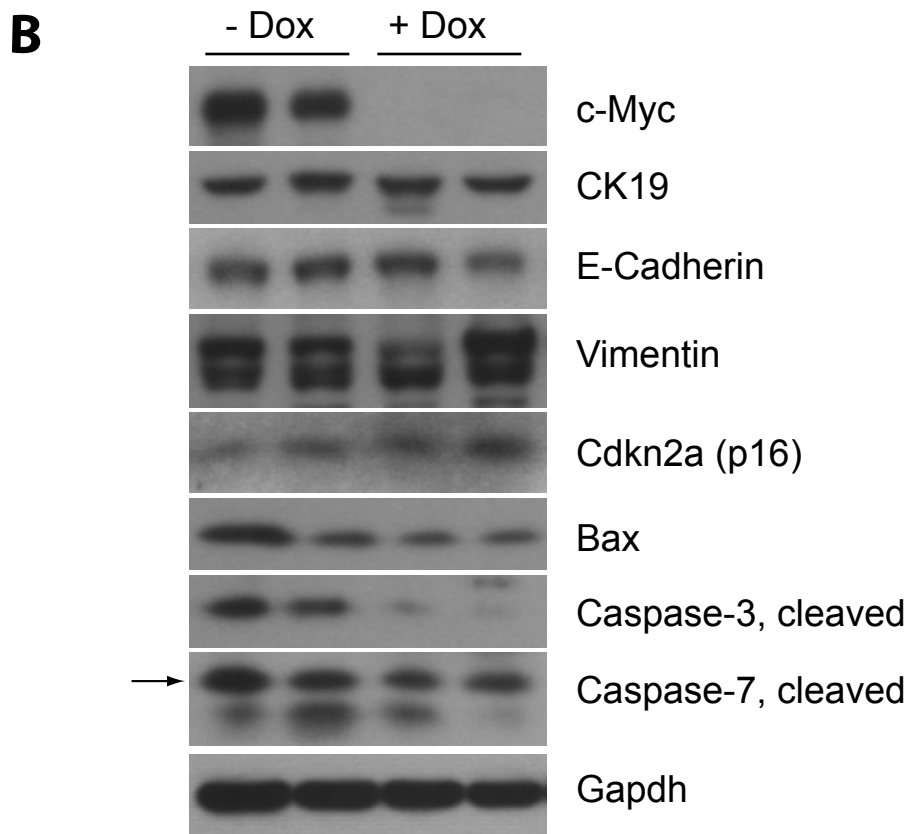

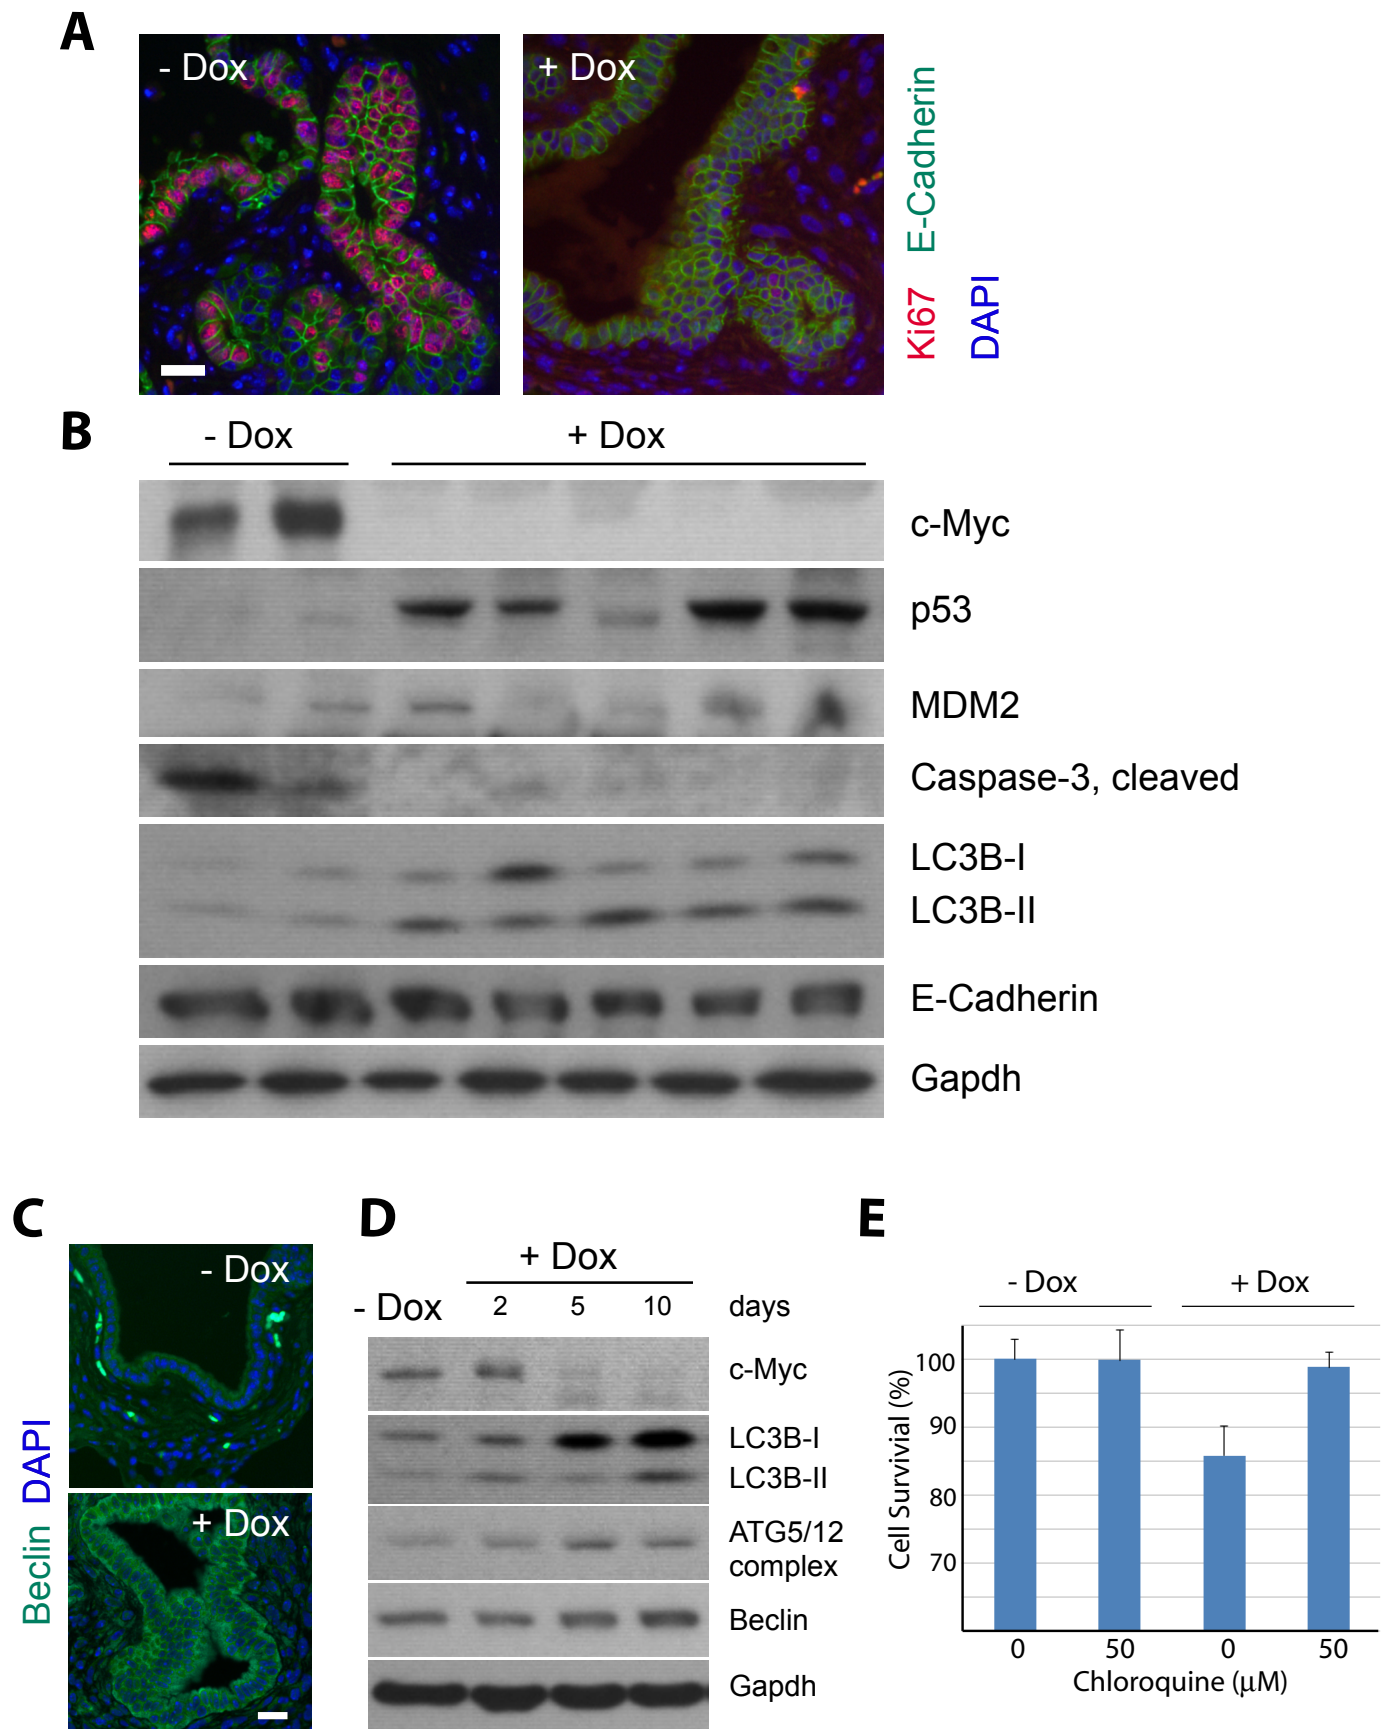

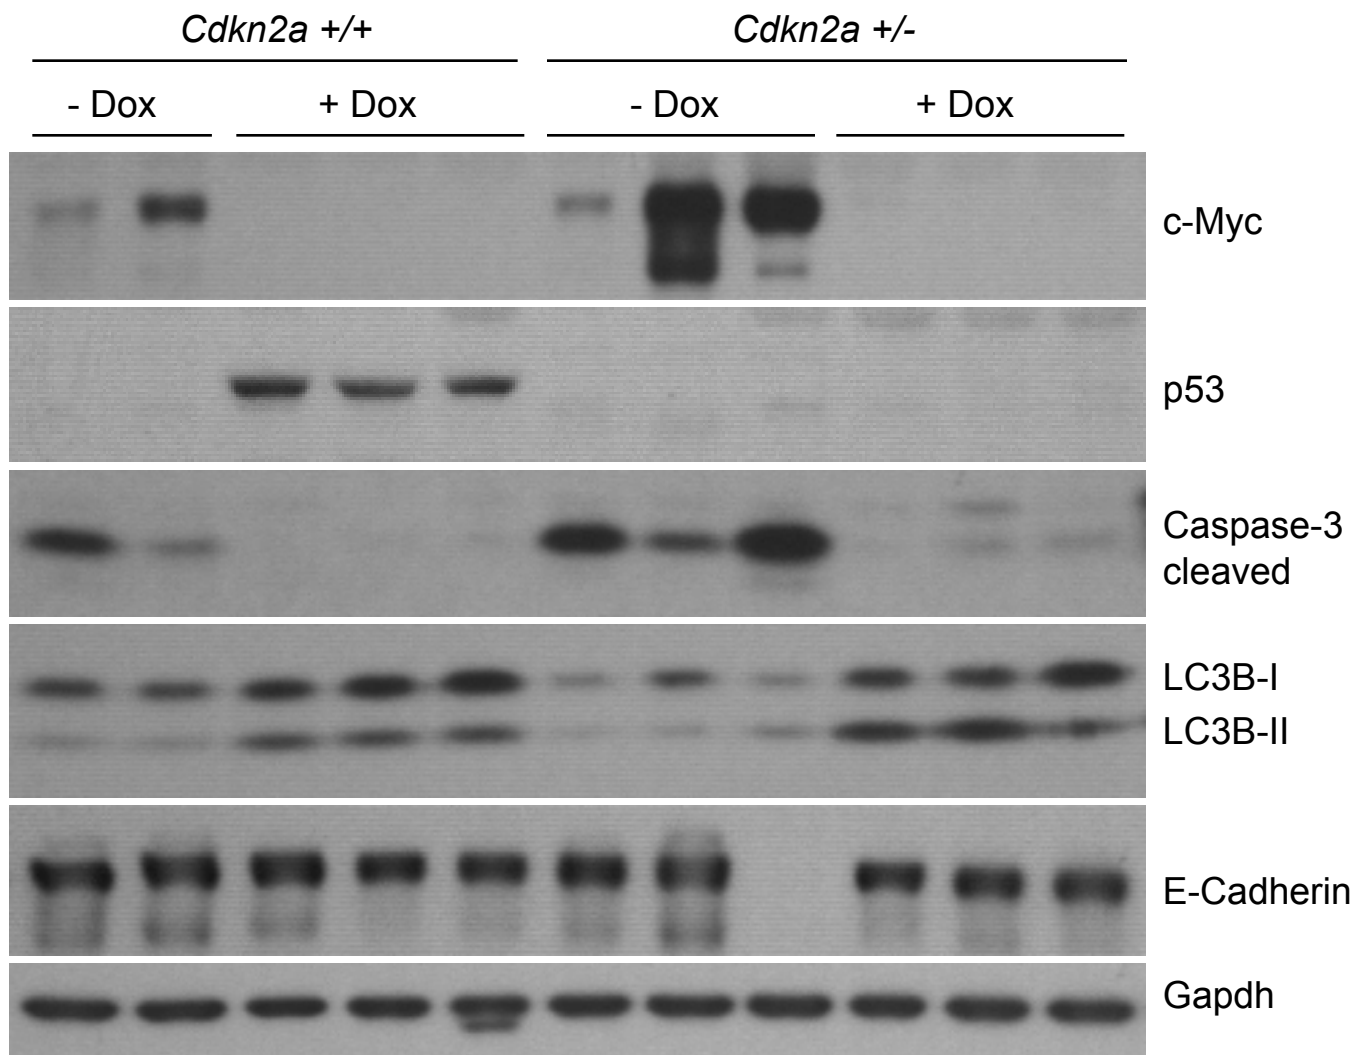

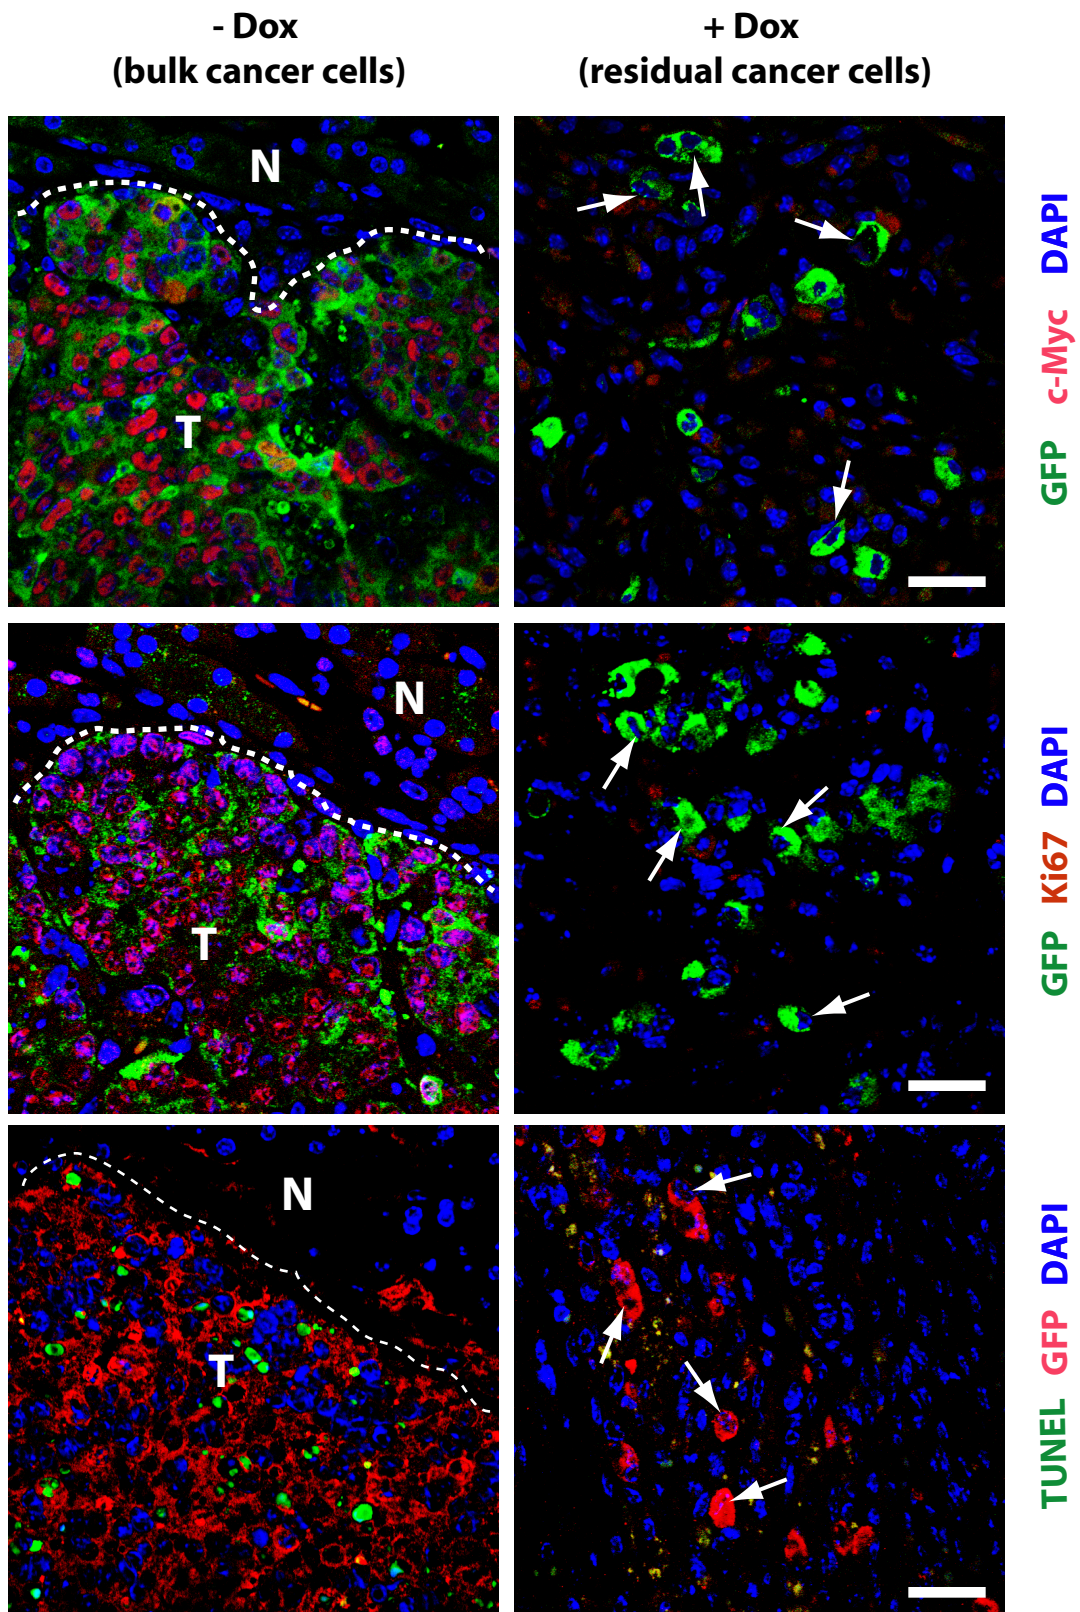

Supplement: NIHMS432608-supplement-2.pdf [file NIHMS432608-supplement-2.pdf]
